# Supplementary material for: Perinuclear Anti-Neutrophil Cytoplasmic Antibodies (pANCA) Impair Neutrophil Candidacidal Activity and Are Increased in the Cellular Fraction of Vaginal Samples from Women with Vulvovaginal Candidiasis
Source: PubMed Central journal article supplement (PMC7712103; doi:10.3390/jof6040225), 2020-10-16
Supplement: jof-06-00225-s001.pdf [file jof-06-00225-s001.pdf]

## Supplemental Figures and Tables

**Table S1.** Clinical features of the enrolled patients, immunological parameters (CAGTA IgA, ASCA, pANCA and S100A8) of the vaginal fluids and protein extracts, and subsets of tests matched to patient samples. Data points in red indicate that the values are below the detection limit of the kit. pANCA data from PEs are expressed in pg/μg of total protein. Yellow coded: first group of samples used for antibodies and S100A8 assessment only in VF. Blue coded: second group of samples, some of which were used for different determinations (RNA extraction from cellular fraction and antibody assessment in parallel in VF and PE). Green coded: clinical samples from patients first described in Pericolini et al. 2018 (1) and further analyzed here. Abbreviations: n.a.: data not available; N: no; Y: yes.

| Clinical condition | PMN Infiltration    | Patient ID | Fungal species     | Patient status, microbiology and pH |          |              |                     |           |      | ASCA in VF (U/ml) |        |            |            | pANCA IgG      |                              | Participant subsets for different analyses |                                                                                    |                                                       |                                  |  |
|--------------------|---------------------|------------|--------------------|-------------------------------------|----------|--------------|---------------------|-----------|------|-------------------|--------|------------|------------|----------------|------------------------------|--------------------------------------------|------------------------------------------------------------------------------------|-------------------------------------------------------|----------------------------------|--|
|                    |                     |            |                    | CAGTA IgA                           | Bacteria | Lactobacilli | Co-infection        | Pregnancy | pH   | IgA               | IgG    | VF (pg/ml) | PE (pg/μg) | S100A8 (pg/ml) | VF for ASCA, pANCA and CAGTA | VF for S100A8                              | Cellular fraction stored in Trizol for RNA extraction and gene expression analysis | PE from Cellular fraction analyzed for ASCA and pANCA | Studied in Pericolini et al. [1] |  |
| VVC                | High or Massive (H) | SP-2426    | <i>C. albicans</i> | +                                   | +        | +            | GBS                 | N         | 4    | 0                 | 0      | 169.2      | n.a.       | n.a.           |                              |                                            |                                                                                    |                                                       |                                  |  |
|                    |                     | SP-2427    | <i>C. albicans</i> | +                                   | +        | +            | none                | N         | 5    | 2                 | 0      | 0          | 0          | 0              | 0                            |                                            |                                                                                    |                                                       |                                  |  |
|                    |                     | SP-2428    | <i>C. albicans</i> | +                                   | +        | +            | none                | N         | 4    | 0                 | 0      | 0          | 20.7       | n.a.           | 448.1                        |                                            |                                                                                    |                                                       |                                  |  |
|                    |                     | SP-1980    | <i>C. albicans</i> | +                                   | +        | +            | none                | N         | 4    | 0                 | 0      | 0          | 24.9       | n.a.           | 294.6                        |                                            |                                                                                    |                                                       |                                  |  |
|                    |                     | SP-4892    | <i>C. albicans</i> | +                                   | +        | +            | none                | N         | n.a. | 0                 | 0      | 0          | 24.9       | n.a.           | 444.9                        |                                            |                                                                                    |                                                       |                                  |  |
|                    |                     | SP-4848    | <i>C. albicans</i> | +                                   | n.a.     | +            | n.a.                | N         | 4    | 0                 | 0      | 0          | 1489.6     | n.a.           | 120.1                        |                                            |                                                                                    |                                                       |                                  |  |
|                    |                     | SP-1074    | <i>C. albicans</i> | +                                   | n.a.     | +            | n.a.                | N         | 5    | 0                 | 0      | 0          | 207.7      | n.a.           | 275.2                        |                                            |                                                                                    |                                                       |                                  |  |
|                    |                     | SP-4361    | <i>C. albicans</i> | +                                   | n.a.     | +            | n.a.                | N         | 5    | 0                 | 0      | 0          | 1356.7     | n.a.           | 145.6                        |                                            |                                                                                    |                                                       |                                  |  |
|                    |                     | SP-3744    | <i>C. albicans</i> | -                                   | n.a.     | +            | n.a.                | N         | n.a. | 0                 | 0      | 0          | 747.7      | n.a.           | 157.3                        |                                            |                                                                                    |                                                       |                                  |  |
|                    |                     | SP-7021    | <i>C. albicans</i> | -                                   | +        | +            | <i>S. vaginalis</i> | Y         | 5    | 1.2               | 0      | 0          | 127.8      | 8.76           | 362.9                        |                                            |                                                                                    |                                                       |                                  |  |
|                    |                     | SP-4976    | <i>C. albicans</i> | -                                   | +        | +            | none                | Y         | n.a. | 1.2               | 0      | 0          | 141.2      | 7.24           | 431.6                        |                                            |                                                                                    |                                                       |                                  |  |
|                    |                     | SP-5880    | <i>C. albicans</i> | +                                   | +        | +            | GBS                 | Y         | n.a. | 1.3               | 0      | 0          | 191.1      | 7.65           | 81.7                         |                                            |                                                                                    |                                                       |                                  |  |
|                    |                     | SP-1523    | <i>C. albicans</i> | -                                   | +        | +            | none                | N         | 4    | 0                 | 0      | 0          | 125.9      | n.a.           | n.a.                         |                                            |                                                                                    |                                                       |                                  |  |
|                    |                     | SP-2300    | <i>C. albicans</i> | +                                   | +        | +            | none                | Y         | 5    | 0                 | 0      | 0          | 212.3      | n.a.           | 80.3                         |                                            |                                                                                    |                                                       |                                  |  |
|                    |                     | SP-2009    | <i>C. albicans</i> | +                                   | +        | +            | none                | Y         | n.a. | 4.7               | 0      | 0          | 71.3       | n.a.           | 441.4                        |                                            |                                                                                    |                                                       |                                  |  |
|                    |                     | SP-4900    | <i>C. albicans</i> | +                                   | n.a.     | +            | n.a.                | Y         | 4    | 4.73              | 0      | 0          | 2016.7     | n.a.           | 247.7                        |                                            |                                                                                    |                                                       |                                  |  |
|                    |                     | SP-7753    | <i>C. albicans</i> | +                                   | +        | +            | GBS                 | N         | 4    | 0.5               | 0      | 0          | 837.0      | 7.82           | n.a.                         |                                            |                                                                                    |                                                       |                                  |  |
|                    |                     | SP-1256    | <i>C. albicans</i> | +                                   | +        | -            | <i>S. vaginalis</i> | N         | 5    | 2.1               | 0      | 0          | 1242       | 7.11           | n.a.                         |                                            |                                                                                    |                                                       |                                  |  |
|                    |                     | SP-4914    | <i>C. albicans</i> | +                                   | +        | -            | GBS+V               | N         | 5    | 1.3               | 0      | 0          | 1722       | 7.84           | n.a.                         |                                            |                                                                                    |                                                       |                                  |  |
|                    |                     | SP-6195    | <i>C. albicans</i> | +                                   | n.a.     | +            | n.a.                | Y         | n.a. | 0                 | 0      | 0          | 1660.0     | n.a.           | 233.7                        |                                            |                                                                                    |                                                       |                                  |  |
|                    |                     | SP-7160    | <i>C. albicans</i> | +                                   | n.a.     | +            | n.a.                | Y         | n.a. | 0                 | 0      | 0          | 1592.5     | n.a.           | 176.1                        |                                            |                                                                                    |                                                       |                                  |  |
|                    |                     | SP-7983    | <i>C. albicans</i> | +                                   | n.a.     | +            | n.a.                | Y         | 5    | 0                 | 0      | 0          | 2094.7     | n.a.           | 286.5                        |                                            |                                                                                    |                                                       |                                  |  |
|                    |                     | SP-9123    | <i>C. albicans</i> | +                                   | n.a.     | +            | n.a.                | Y         | 5    | 0                 | 0      | 0          | 1607.1     | n.a.           | 288.43                       |                                            |                                                                                    |                                                       |                                  |  |
|                    |                     | SP-9654    | <i>C. albicans</i> | +                                   | n.a.     | +            | n.a.                | Y         | 5    | 0                 | 0      | 0          | 712.2      | n.a.           | 388.2                        |                                            |                                                                                    |                                                       |                                  |  |
|                    |                     | SP-3457    | <i>C. albicans</i> | -                                   | n.a.     | +            | n.a.                | Y         | n.a. | 0                 | 0      | 0          | 1486.8     | n.a.           | 103.6                        |                                            |                                                                                    |                                                       |                                  |  |
|                    |                     | SP-6566    | <i>C. albicans</i> | +                                   | n.a.     | +            | n.a.                | Y         | n.a. | 0                 | 0      | 0          | 731.1      | n.a.           | 158.8                        |                                            |                                                                                    |                                                       |                                  |  |
|                    |                     | SP-3544    | <i>C. albicans</i> | -                                   | n.a.     | +            | n.a.                | Y         | 5    | 0                 | 0      | 0          | 880.5      | n.a.           | 156.6                        |                                            |                                                                                    |                                                       |                                  |  |
|                    |                     | SP-5811    | <i>C. albicans</i> | -                                   | n.a.     | +            | n.a.                | Y         | 5    | 0                 | 0      | 0          | 2318.4     | n.a.           | 308.1                        |                                            |                                                                                    |                                                       |                                  |  |
|                    |                     | SP-6387    | <i>C. albicans</i> | -                                   | +        | +            | none                | N         | n.a. | 0                 | 0      | 0          | 112.7      | 5.72           | n.a.                         |                                            |                                                                                    |                                                       |                                  |  |
|                    |                     | SP-5231    | <i>C. albicans</i> | -                                   | +        | +            | GBS                 | N         | 4    | 0                 | 0.5    | 0          | 0          | 5.08           | 348.7                        |                                            |                                                                                    |                                                       |                                  |  |
| SP-4314            | <i>C. albicans</i>  | +          | +                  | +                                   | none     | N            | 4                   | 0.3       | 0    | 0                 | 342.4  | n.a.       | 403.6      |                |                              |                                            |                                                                                    |                                                       |                                  |  |
| SP-1325            | <i>C. albicans</i>  | +          | +                  | +                                   | none     | N            | 5                   | 0.3       | 0    | 0                 | 186.0  | n.a.       | 298.6      |                |                              |                                            |                                                                                    |                                                       |                                  |  |
| SP-9246            | <i>C. albicans</i>  | +          | +                  | +                                   | none     | N            | 4                   | 0         | 0    | 0                 | 175.9  | n.a.       | 305.2      |                |                              |                                            |                                                                                    |                                                       |                                  |  |
| SP-707             | <i>C. albicans</i>  | -          | n.a.               | +                                   | n.a.     | N            | n.a.                | 0         | 0    | 0                 | 1210.0 | n.a.       | 275.9      |                |                              |                                            |                                                                                    |                                                       |                                  |  |
| SP-7225            | <i>C. albicans</i>  | -          | n.a.               | +                                   | n.a.     | N            | n.a.                | 0         | 0    | 0                 | 1550.4 | n.a.       | 111.0      |                |                              |                                            |                                                                                    |                                                       |                                  |  |
| SP-7623            | <i>C. albicans</i>  | -          | n.a.               | +                                   | n.a.     | N            | 4                   | 0         | 0    | 0                 | 1035.7 | n.a.       | 483.9      |                |                              |                                            |                                                                                    |                                                       |                                  |  |
| SP-1458            | <i>C. albicans</i>  | n.a.       | n.a.               | +                                   | n.a.     | N            | 5                   | 0         | 0    | 0                 | 1043.2 | n.a.       | 447.8      |                |                              |                                            |                                                                                    |                                                       |                                  |  |
| SP-8467            | <i>C. albicans</i>  | -          | n.a.               | +                                   | n.a.     | N            | 5                   | 0         | 0    | 0                 | 1524.8 | n.a.       | 277.7      |                |                              |                                            |                                                                                    |                                                       |                                  |  |
| SP-8605            | <i>C. albicans</i>  | -          | n.a.               | +                                   | n.a.     | N            | n.a.                | 0         | 0    | 0                 | 1116.6 | n.a.       | 214.3      |                |                              |                                            |                                                                                    |                                                       |                                  |  |
| SP-5714            | <i>C. albicans</i>  | +          | n.a.               | +                                   | n.a.     | N            | 4                   | 0         | 0    | 0                 | 2033.5 | n.a.       | 36.6       |                |                              |                                            |                                                                                    |                                                       |                                  |  |
| SP-4134            | <i>C. albicans</i>  | -          | n.a.               | +                                   | n.a.     | N            | 4                   | 0         | 0    | 0                 | 1295.6 | n.a.       | 425.6      |                |                              |                                            |                                                                                    |                                                       |                                  |  |
| SP-6884            | <i>C. albicans</i>  | -          | +                  | +                                   | none     | Y            | 4                   | 0.2       | 0    | 0                 | 371.2  | 6.11       | n.a.       |                |                              |                                            |                                                                                    |                                                       |                                  |  |
| SP-1566            | <i>C. albicans</i>  | -          | +                  | +                                   | none     | Y            | 4                   | 0         | 0    | 0                 | 315.7  | n.a.       | 23.3       |                |                              |                                            |                                                                                    |                                                       |                                  |  |
| SP-8850            | <i>C. albicans</i>  | -          | +                  | +                                   | GBS      | Y            | 4                   | 0         | 0    | 0                 | 170.5  | 4.53       | n.a.       |                |                              |                                            |                                                                                    |                                                       |                                  |  |
| SP-6507            | <i>C. albicans</i>  | +          | +                  | +                                   | none     | N            | 5                   | 0         | 0    | 0                 | 1516   | 6.37       | n.a.       |                |                              |                                            |                                                                                    |                                                       |                                  |  |
| SP-7983            | <i>C. albicans</i>  | +          | +                  | +                                   | none     | N            | 5                   | 1.85      | 0    | 0                 | 1548   | 6.86       | n.a.       |                |                              |                                            |                                                                                    |                                                       |                                  |  |
| SP-9336            | <i>C. glabrata</i>  | +          | +                  | +                                   | none     | N            | 4                   | 0         | 0    | 0                 | 169.2  | 5.51       | 430.5      |                |                              |                                            |                                                                                    |                                                       |                                  |  |
| SP-9330            | <i>C. glabrata</i>  | +          | +                  | +                                   | none     | N            | 5                   | 1.2       | 0    | 0                 | 169.3  | 5.72       | 305.8      |                |                              |                                            |                                                                                    |                                                       |                                  |  |
| SP-6605            | <i>C. glabrata</i>  | +          | +                  | +                                   | GBS      | N            | 4                   | 0         | 0    | 0                 | 371.7  | n.a.       | 179.2      |                |                              |                                            |                                                                                    |                                                       |                                  |  |
| SP-5849            | <i>C. krusei</i>    | +          | +                  | +                                   | none     | N            | 5                   | 0.4       | 0    | 0                 | 214.7  | 3.49       | 219.4      |                |                              |                                            |                                                                                    |                                                       |                                  |  |
| SP-5394            | <i>quillmoosii</i>  | -          | +                  | +                                   | none     | N            | 5                   | 0         | 0    | 0                 | 61.3   | 6.58       | 454.6      |                |                              |                                            |                                                                                    |                                                       |                                  |  |

Key: Red numbers: values below the cut-off level of detection; VF: vaginal fluids; n.a.: data not available for this sample; PE: protein extracts

## Reference:

- Pericolini E, Perito S, Castagnoli A, Gabrielli E, Mencacci A, Blasi E, Vecchiarelli A, Wheeler RT. 2018. Epitope unmasking in vulvovaginal candidiasis is associated with hyphal growth and neutrophilic infiltration. *PLoS One* 13:e0201436.

**Table S2.** Primers used for real-time PCR analysis.

-h-MPO FWD: 5'-TTT GAC AAC CTG CAC GAT GAC-3'  
 -h-MPO REV: 5'-CGG TTG TGC TCC CGA AGT AA-3'  
 -h-CD11b FWD: 5'-GAT CCA ACC TAC GGC AGC AG-3'  
 -h-CD11b REV: 5'-ATC CGC CGA AAG TCA TGT GG-3'  
 -h-GADPH FWD: 5'-CGG ATT TGG TCG TAT TGG G-3'  
 -h-CD11b REV: 5'-CTC GCT CCT GGA AGA TGG-3'

**Table S3.** Clinical features of the healthy non-colonized enrolled women, and immunological parameters (CAGTA IgA, ASCA, pANCA and S100A8) of the VF. Data points in red indicate that the values are below the detection limit of the kit. Abbreviations: n.a.: data not available; N: no; Y: yes.

| Clinical condition | PMN Infiltration | Patient ID | Fungal species | Patient status, microbiology and pH |          |              |                     |           |      | ASCA in VF (U/ml) |      | pANCA IgG  |                  | S100A8 (pg/ml) |
|--------------------|------------------|------------|----------------|-------------------------------------|----------|--------------|---------------------|-----------|------|-------------------|------|------------|------------------|----------------|
|                    |                  |            |                | CAGTA IgA                           | Bacteria | Lactobacilli | Co-infection        | Pregnancy | pH   | IgA               | IgG  | VF (pg/ml) | PE (pg/ $\mu$ g) |                |
| non-Colonized      | None             | SP-2894    | none           | +                                   | +        | +            | none                | N         | 4    | 0.5               | 0    | 177.6      | n.a.             | 422.6          |
|                    |                  | SP-6653    | none           | -                                   | +        | +            | none                | N         | 4    | 0.22              | 0    | 0          | n.a.             | 205            |
|                    |                  | SP-2378    | none           | -                                   | +        | -            | <i>G. vaginalis</i> | N         | n.a. | 1.6               | 0    | 1058.3     | n.a.             | 434.3          |
|                    |                  | SP4652     | none           | -                                   | n.a.     | +            | n.a.                | N         | n.a. | 0                 | 0    | 1770.1     | n.a.             | 363            |
|                    |                  | SP-0995    | none           | -                                   | n.a.     | +            | n.a.                | N         | n.a. | 0                 | 0    | 2069.6     | n.a.             | 279.8          |
|                    |                  | SP-6878    | none           | -                                   | n.a.     | +            | n.a.                | N         | 4    | 2.3               | 0    | 0          | n.a.             | 0              |
|                    |                  | SP-8270    | none           | -                                   | n.a.     | +            | n.a.                | N         | n.a. | 0                 | 0    | 1837.8     | n.a.             | 6.5            |
|                    |                  | SP-7261    | none           | -                                   | +        | +            | none                | Y         | 4    | 0                 | 0.39 | 109        | n.a.             | 418.4          |
|                    |                  | SP-8031    | none           | -                                   | +        | +            | none                | Y         | n.a. | 0                 | 0    | 183.7      | n.a.             | 63.2           |

  

| Key | Red numbers: values below the cut-off level of detection | VF: vaginal fluids   |
|-----|----------------------------------------------------------|----------------------|
|     | n.a.: data not available for this sample                 | PE: protein extracts |

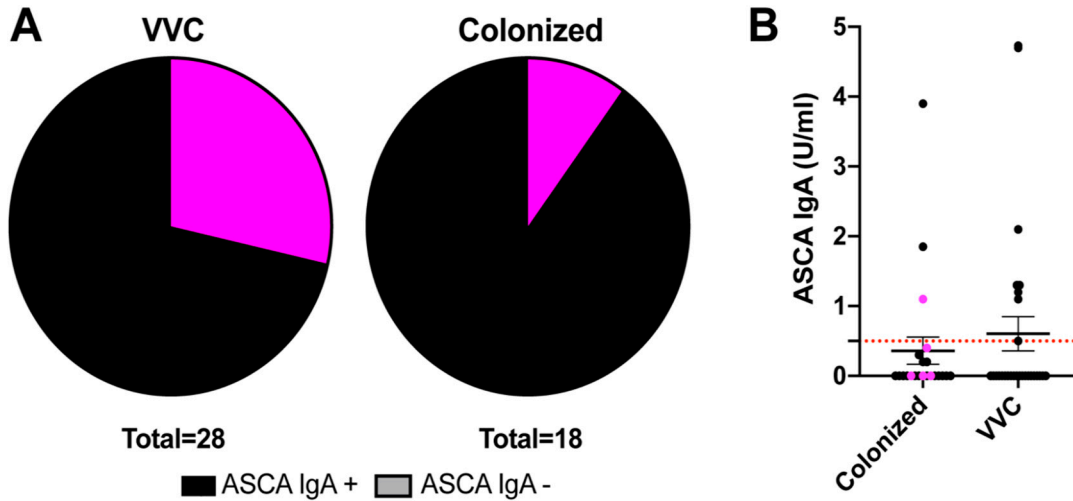

**Figure S1.** ASCA IgA determination. **A:** Pie charts of ASCA IgA in positive (magenta) and negative (black) samples from vaginal fluids (VF) of VVC and colonized women. **B:** Mean  $\pm$  SEM of ASCA IgA (U/mL) in vaginal fluids (VF) from VVC and colonized women.

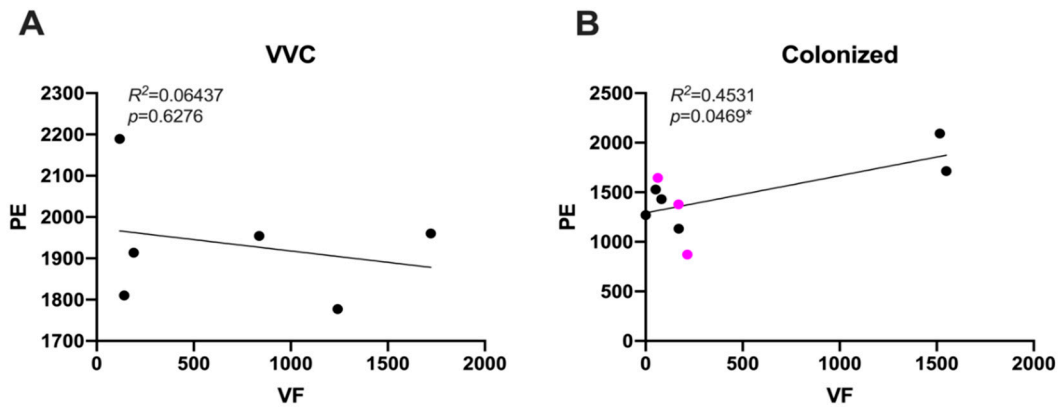

**Figure S2.** Pearson's correlation graphs of pANCA IgG levels in VF or PEs of VVC and colonized women. Values of pANCA IgG in VF and PEs from VVC (**A**) and colonized (**B**) women were analyzed by simple linear regression. R squared ( $r^2$ ) and p values are reported in the graphs.
